# Supplementary material
Source: publisher figshare collection journal article supplement (https://acs.figshare.com/ndownloader/files/17509676)
Supplement: Supplementary file 1 [file 17509676]

---

# Supporting Information

## **Sub-nanocatalysis for Efficient Aqueous Nitrate Reduction:**

### **Effect of Strong Metal–Support Interaction**

Jiacheng Li, Miao Li\*, Xu Yang, Sai Wang, Yu Zhang, Fang Liu, Xiang Liu.

\*Corresponding Author.

Tel: 86-10-62772485

E-mail: miaoli@tsinghua.edu.cn

School of Environment, Tsinghua University

30# Shuangqing Road, Hai Dian Distract, Beijing, 100084, China

**Table S1** Adsorption energies of H or NO<sub>2</sub> on the NO adsorbed Pd<sub>3</sub>In/Fe<sub>3</sub>O<sub>4</sub>(111) or Pd<sub>4</sub>/Fe<sub>3</sub>O<sub>4</sub> (111) surfaces.

| Pd <sub>3</sub> In/Fe <sub>3</sub> O <sub>4</sub> | $\Delta E$ (eV) | $E_{\text{Pd3In-X}}$ (eV) | $E_{\text{Pd3In}}$ (eV) | $E_X$ (eV) |
|---------------------------------------------------|-----------------|---------------------------|-------------------------|------------|
| Reaction 1                                        | -2.73           | -1257.141                 | -1253.296               | -1.116     |
| Reaction 2                                        | -2.99           | -1273.366                 | -1253.296               | -17.081    |

  

| Pd <sub>4</sub> /Fe <sub>3</sub> O <sub>4</sub> | $\Delta E$ (eV) | $E_{\text{Pd4-X}}$ (eV) | $E_{\text{Pd4}}$ (eV) | $E_X$ (eV) |
|-------------------------------------------------|-----------------|-------------------------|-----------------------|------------|
| Reaction 1                                      | -0.67           | -1259.181               | -1257.394             | -1.116     |
| Reaction 2                                      | -0.40           | -1274.878               | -1257.394             | -17.081    |

Reaction steps:

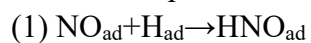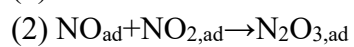

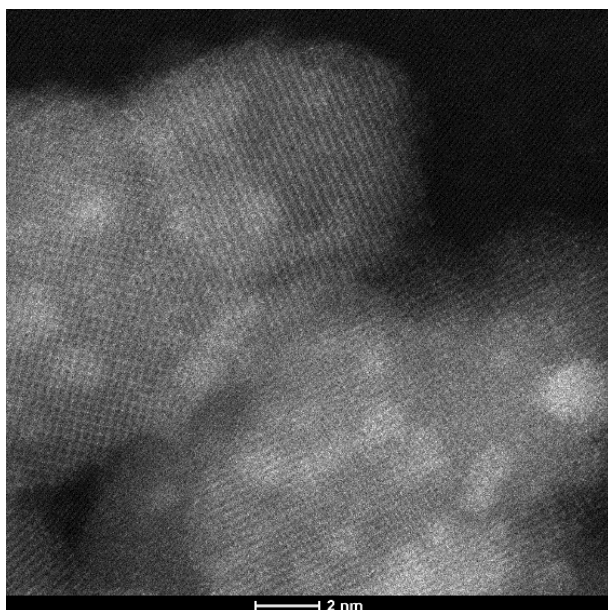

Figure S1.HAADF-STEM images of 10-PI/F in high magnification

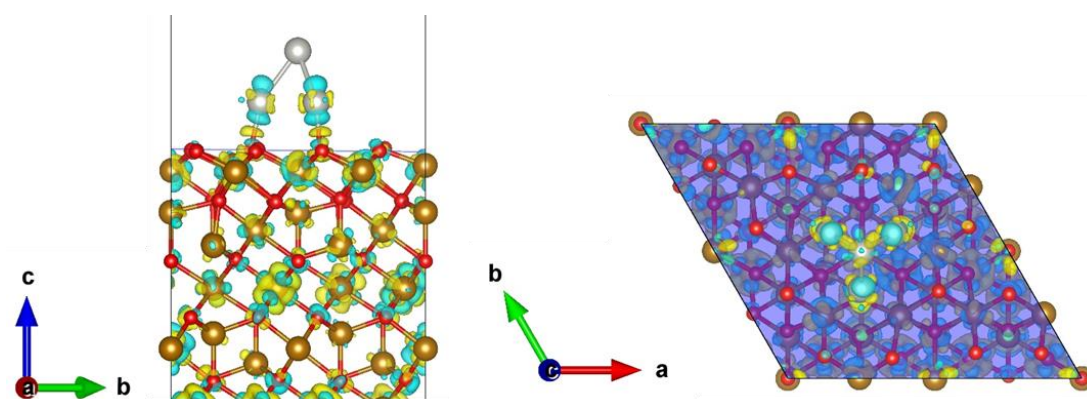

**Figure S2.** Charge density difference for  $\text{Pd}_3\text{In}/\text{Fe}_3\text{O}_4(111)$ . The yellow balls represent the Fe atoms, the Red balls are oxygen atoms denote, the grey balls represent Pd atoms. The violet areas suggest enriched electron density.

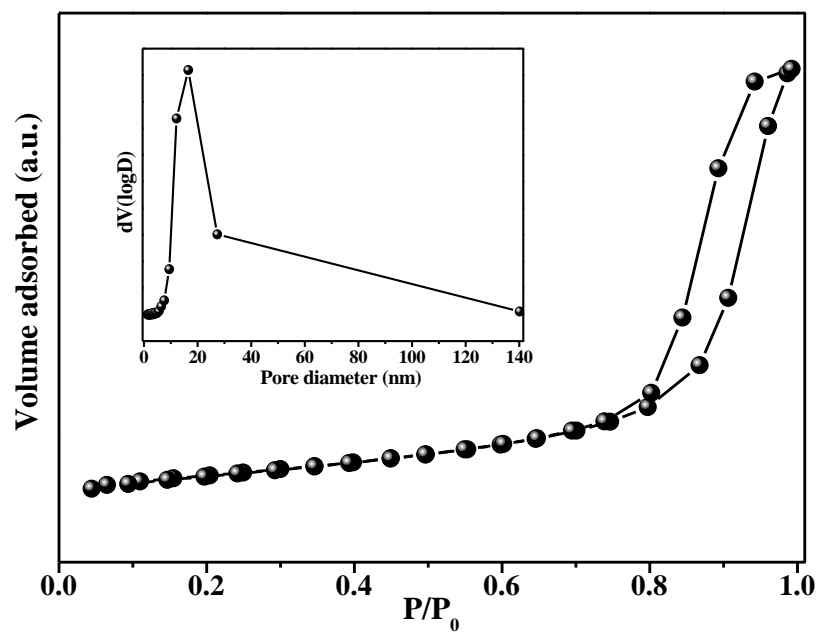

**Figure S3.**  $\text{N}_2$  adsorption- desorption isotherms and pore size distribution (inset) of  $\text{Fe}_3\text{O}_4$  supports

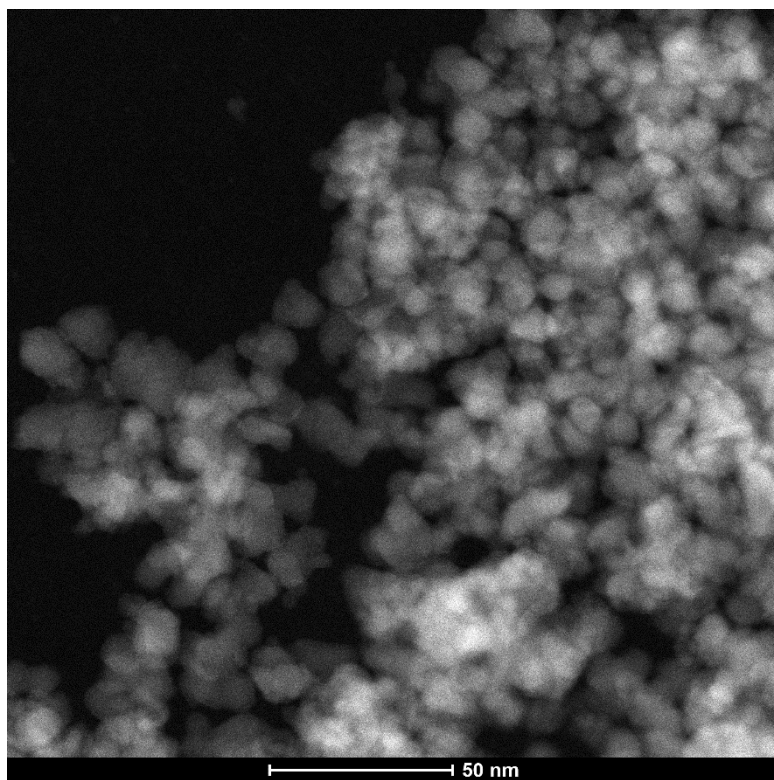

**Figure S4.** HAADF-STEM images of 0.4-PI/F.

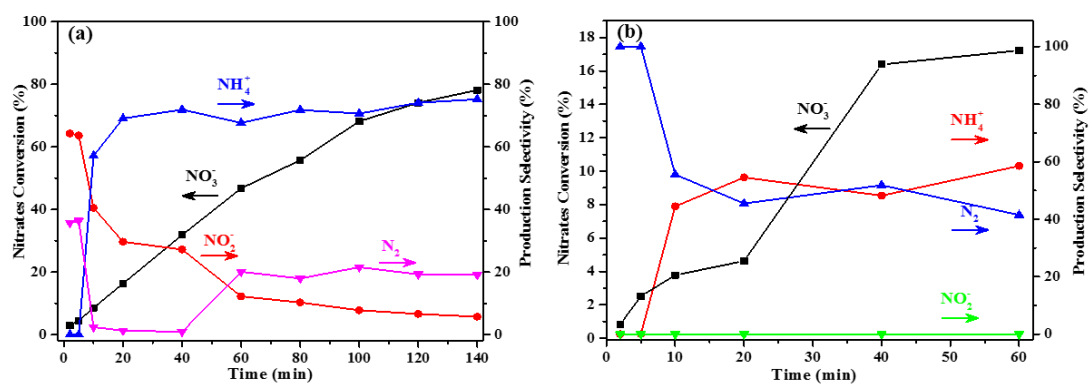

**Figure S5.** Nitrates conversion and products selectivity on 0.4-PI/F (a) and 1.25-I/F (b) catalysts as a function of time

---

### Effect of External Mass Transfer

The mass transfer between aqueous nitrates solution and solid catalysts were evaluated based on previous study.<sup>[1-3]</sup> First, the slip velocity of the catalyst particle was calculated according to Stokes' law:

$$u_t = \frac{gd_p^2(\rho_p - \rho)}{18\mu} ; (S1)$$

where  $g$  is gravity constant ( $9.81 \text{ m}\cdot\text{s}^{-2}$ ),  $d_p$  is the particle diameter of the catalysts ( $\sim 20 \text{ nm}$  as shown in Figure S3),  $\rho_p$  is the density of the catalysts and is assumed to be same to ferroferric oxide ( $5.18 \text{ g}\cdot\text{cm}^{-3}$ ),  $\rho$  is water density ( $1\times 10^6 \text{ g}\cdot\text{m}^{-3}$  at  $20^\circ\text{C}$ ) and  $\mu$  is absolute viscosity of water ( $1.002 \text{ g}\cdot\text{m}^{-1}\cdot\text{s}^{-1}$  at  $20^\circ\text{C}$ ). Consequently, the slip velocity is  $9.09\times 10^{-10} \text{ m}\cdot\text{s}^{-1}$ .

Moreover, the Reynolds number ( $Re$ ), Peclet number ( $Pe$ ) and Sherwood number ( $Sh$ ) were calculated by the following expression:

$$Re = \frac{d_p u_t}{\nu} ; (S2)$$

$$Pe = \frac{d_p u_t}{D} ; (S3)$$

$$Sh = \frac{4}{Pe} \ln\left(\frac{1}{1 - Pe/2}\right) ; (S4)$$

where  $\nu$  is kinematic viscosity of water ( $1.003\times 10^{-6} \text{ m}^2\cdot\text{s}^{-1}$  at  $20^\circ\text{C}$ ) and  $D$  is the nitrate diffusion coefficient in pure water ( $1.7\times 10^{-9} \text{ m}^2\cdot\text{s}^{-1}$ ).

Then the aqueous/solid mass transfer coefficient could be determined based on the following expression:

$$k_{aq/s} = \frac{D}{d_p} Sh = \frac{4D}{Pe \times d_p} \ln\left(\frac{1}{1 - Pe/2}\right) ; (S5)$$

The value of  $k_{aq/s}$  is  $3.54\times 10^{-4} \text{ m}\cdot\text{s}^{-1}$ , moreover, the geometric surface area of the catalyst per volume of solution ( $a$ ) is determined as follows:

$$a = \frac{\text{total surface area}}{\text{total volume}} = \frac{SA_p \times M}{\rho_p \times V_p} \times \frac{1}{V_R} ; (S6)$$

in which,  $SA_p$  is the surface area of one catalyst aggregate,  $M$  is the total mass of catalyst ( $0.2 \text{ g}$ ),  $V_p$  is the volume of one catalyst aggregate, and  $V_R$  is the volume of the reaction solution ( $160 \text{ mL}$ ).

At last, mass transfer rate constant is equal to the  $k_{aq/s}$  multiplied by  $a$ :

$$k_{aq/s} \cdot a = 6.19 \times 10^7 / \text{s} = 1.03 \times 10^6 / \text{min}$$

This value is much larger than the measured  $k_{obs, I-PI/F}$  value ( $1.56 \times 10^{-2}$ ), which indicates the aqueous/solid mass transfer is negligible in the reaction.

### Effect of Intraparticle Mass Transfer



---

The potential of intraparticle diffusion resistance was also discussed based on the following criteria:

$$\text{No resistance: } \frac{k_{obs} L^2 \tau}{D\theta} < 1 ; (S7)$$

$$\text{Significant resistance: } \frac{k_{obs} L^2 \tau}{D\theta} > 1 ; (S8)$$

where  $L=d_p/6$  ( $3.3 \times 10^{-9}$  m),  $\tau$  is the tortuosity factor (ranging from 2 to 10),  $D$  is the nitrate diffusion coefficient in pure water ( $1.7 \times 10^{-9}$  m<sup>2</sup>·s<sup>-1</sup>) and  $\theta$  is the porosity of the catalyst particle (ranging from 0.2 to 0.7). Here 0.2 and 10 were used as values for  $\theta$  and  $\tau$  in order to get the largest criteria value. The calculated value is  $5.0 \times 10^{-9} \ll 1$ , suggesting the reaction is rarely affected by the intraparticle mass transfer resistance.

## References

- [1] D. P. Durkin, T. Ye, J. Choi, K. J. T. Livid, H. C. D. Longe, P. C. Trulovef, D. H. Fairbrothera, L. M. Haverhalsg, D. Shuai, *Appl. Catal. B Environ.* **2018**, 221, 290.
- [2] Q. M. Zheng, D. P. Durkin, J. E. Elenewski, Y. X. Sun, N. A. Banek, L. K. Hua, H. N. Chen, M. J. Wagner, W. Zhang, D. M. Shuai, *Environ. Sci. Technol.* **2016**, 50, 12938.
- [3] T. Ye, D. P. Durkin, N. A. Banek, M. J. Wagner, D. Shuai, *ACS Appl. Mater. Interfaces.* **2017**, 9, 27421.
